# Supplementary material
Source: PubMed Central journal article supplement (PMC9462971)
Supplement: EMS152108-supplement-Major_Resources_Table.pdf [file EMS152108-supplement-Major_Resources_Table.pdf]

## Major Resources Table

In order to allow validation and replication of experiments, all essential research materials listed in the Methods should be included in the Major Resources Table below. Authors are encouraged to use public repositories for protocols, data, code, and other materials and provide persistent identifiers and/or links to repositories when available. Authors may add or delete rows as needed.

### Animals (in vivo studies)

| Species                       | Vendor or Source                                                                | Background Strain | Sex  | Persistent ID / URL     |
|-------------------------------|---------------------------------------------------------------------------------|-------------------|------|-------------------------|
| Mouse ( <i>Mus musculus</i> ) | Charles River or Laboratory Animal Science, Chinese Academy of Medical Sciences | C57BL/6J          | Male | Cat#632 (Charles River) |

### Antibodies

| Target antigen                                             | Vendor or Source          | Catalog #                  | Working concentration | Lot # (preferred but not required) | Persistent ID / URL                                                                                                                                                                                                                             |
|------------------------------------------------------------|---------------------------|----------------------------|-----------------------|------------------------------------|-------------------------------------------------------------------------------------------------------------------------------------------------------------------------------------------------------------------------------------------------|
| MCT1                                                       | Santa Cruz                | H-1, sc-365501             | 1:1000                |                                    | <a href="https://www.scbt.com/p/mct1-antibody-h-1">https://www.scbt.com/p/mct1-antibody-h-1</a>                                                                                                                                                 |
| MCT1                                                       | Proteintech               | 20139-1-AP                 | 1:10,000              |                                    | <a href="https://www.ptglab.com/products/MCT1-Antibody-20139-1-AP.htm">https://www.ptglab.com/products/MCT1-Antibody-20139-1-AP.htm</a>                                                                                                         |
| MCT4                                                       | Santa Cruz                | G-7, sc-376465             | 1:1,000               |                                    | <a href="https://www.scbt.com/p/mct4-antibody-g-7">https://www.scbt.com/p/mct4-antibody-g-7</a>                                                                                                                                                 |
| Vinculin                                                   | Merck                     | Clone VIN-11-5, SAB4200729 | 1:5,000               |                                    | <a href="https://www.sigmaaldrich.com/GB/en/product/sigma/sab4200729">https://www.sigmaaldrich.com/GB/en/product/sigma/sab4200729</a>                                                                                                           |
| Vinculin                                                   | Cell Signaling Technology | E1E9V, 13901               | 1:5,000               |                                    | <a href="https://www.cellsignal.co.uk/products/primary-antibodies/vinculin-e1e9v-xp-rabbit-mab/13901">https://www.cellsignal.co.uk/products/primary-antibodies/vinculin-e1e9v-xp-rabbit-mab/13901</a>                                           |
| Goat anti-rabbit IgG (H+L) (DyLight™ 800 4X PEG Conjugate) | Cell Signaling Technology | 5151                       | 1:20,000              |                                    | <a href="https://www.cellsignal.co.uk/products/secondary-antibodies/anti-rabbit-igg-h-l-dylight-800-4x-peg-conjugate/5151">https://www.cellsignal.co.uk/products/secondary-antibodies/anti-rabbit-igg-h-l-dylight-800-4x-peg-conjugate/5151</a> |
| Goat anti-mouse IgG (H+L) (DyLight™ 680 Conjugate)         | Cell Signaling Technology | 5470                       | 1:20,000              |                                    | <a href="https://www.cellsignal.co.uk/products/secondary-antibodies/anti-mouse-igg-h-l-dylight-680-conjugate/5470">https://www.cellsignal.co.uk/products/secondary-antibodies/anti-mouse-igg-h-l-dylight-680-conjugate/5470</a>                 |

### Cultured Cells

| Name                  | Vendor or Source | Sex (F, M, or unknown) | Persistent ID / URL |
|-----------------------|------------------|------------------------|---------------------|
| C2C12 mouse myoblasts | ATCC             | unknown                | CRL-1772            |
| H9c2 (2-1)            | ATCC             | unknown                | CRL-1446            |
| HeLa                  | ATCC             | Female                 | CCL-2               |

## Other

| Description                                                                     | Source / Repository | Persistent ID / URL            |
|---------------------------------------------------------------------------------|---------------------|--------------------------------|
| Sodium malonate dibasic                                                         | Merck               | 63409                          |
| Cyclosporine A (CsA)                                                            | Merck               | 30024                          |
| Carbonyl Cyanide p-(Trifluoromethoxy)phenylhydrazone (FCCP)                     | Merck               | C2920                          |
| Gramicidin from <i>Bacillus aneurinolyticus</i> ( <i>Bacillus brevis</i> )      | Merck               | G5002                          |
| Nigericin sodium salt                                                           | Merck               | N7143                          |
| BAM15                                                                           | Merck               | SML1760                        |
| Monensin sodium salt                                                            | Merck               | M5273                          |
| Oligomycin from <i>Streptomyces diastatochromogenes</i>                         | Merck               | O4876                          |
| Rotenone                                                                        | Santa Cruz          | sc-203242                      |
| Antimycin A from <i>Streptomyces sp.</i>                                        | Merck               | A8674                          |
| 4,4'-Diisothiocyanatostilbene-2,2'-disulfonic acid (DIDS) disodium salt hydrate | Merck               | D3514                          |
| Malonamic acid                                                                  | Merck               | S937436                        |
| Sodium L-Lactate                                                                | Merck               | L7022                          |
| AZD3965                                                                         | Cayman Chemical     | 19912                          |
| AR-C141990 hydrochloride                                                        | Biotechne (Tocris)  | 5658                           |
| Lipofectamine RNAiMAX                                                           | Invitrogen          | 13778150                       |
| Human MCT1 siRNA A                                                              | Thermo Fisher       | 1299001                        |
| Human MCT1 siRNA B                                                              | Santa Cruz          | sc-37235                       |
| Control siRNA A                                                                 | Thermo Fisher       | 12935300                       |
| Control siRNA B                                                                 | Santa Cruz          | sc-37007                       |
| Human MCT4 siRNA                                                                | Santa Cruz          | H2, sc-45892                   |
| Mouse MCT1 A siRNA                                                              | Thermo Fisher       | MSS209081, #1320001            |
| Mouse MCT1 B siRNA                                                              | Merck               | SASI_Mm01_00112354, #NM_009196 |
| DMEM (high glucose, GlutaMAX, pyruvate)                                         | Gibco               | 31966047                       |
| Fetal Bovine Serum                                                              | Gibco               | 10270106                       |
| Opti-MEM                                                                        | Gibco               | 31985070                       |
| [ <sup>13</sup> C <sub>3</sub> ]-malonate                                       | Merck               | 490202                         |
| [ <sup>13</sup> C <sub>4</sub> ]-succinate                                      | Merck               | 491985                         |
| Kolliphor® EL                                                                   | Merck               | C5135                          |
| MitoB                                                                           | Cayman Chemical     | 17116                          |

## ARRIVE GUIDELINES

The ARRIVE guidelines (<https://arriveguidelines.org/>) are a checklist of recommendations to improve the reporting of research involving animals. Key elements of the study design should be included below to better enable readers to scrutinize the research adequately, evaluate its methodological rigor, and reproduce the methods or findings.

### Study Design

| Groups                                                                   | Sex | Age        | Littermates (Yes/No) | Other description                 |
|--------------------------------------------------------------------------|-----|------------|----------------------|-----------------------------------|
| All animals for in vivo LAD ligation experiments and ex vivo Langendorff | M   | 8-12 weeks | No                   | All were non-recovery experiments |

**Sample Size:** Please explain how the sample size was decided Please provide details of any a *prior* sample size calculation, if done.

Sample sizes for in vivo experiments were based on previous power calculations and experience in the in vivo LAD ligation model of MI and ex vivo Langendorff perfusion model.

### Inclusion Criteria

N/A

### Exclusion Criteria

The exclusion criteria for LAD ligation was an area at risk out of the range of 30%-60%.

### Randomization

Animals were randomly assigned to treatment or control groups.

### Blinding

Investigators carrying out in vivo work were blinded to treatments and analysis was carried out blindly to reduce bias.
